# Supplementary material
Source: PubMed Central journal article supplement (PMC2843188)
Supplement: supp_M109.057745_jbc.M109.057745-1.pdf [file supp_M109.057745_jbc.M109.057745-1.pdf]

## Supplemental FIGURE S1

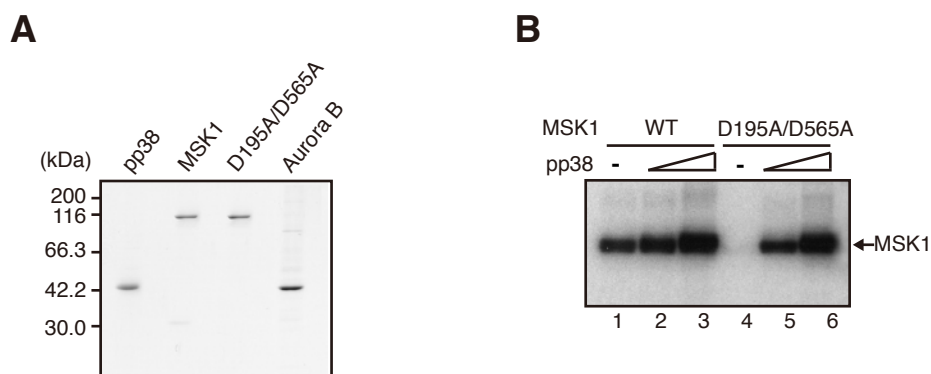

**FIGURE S1. Purified kinases for chromatin kinase assays.** *A*, the p38 kinase was co-expressed with constitutively active MKK6 in *E. coli* to obtain its active form, pp38 whereas recombinant MSK1, its inactive mutant, D195A/D565A, and Aurora B were expressed in insect cells. The expressed kinases were purified to near homogeneity and separated by SDS-PAGE. The gel was stained with CBB. In D195A/D565A, aspartates at residues 195 and 565 were mutated to an alanine to inactivate both NTKD and CTKD activities. *B*, wild-type MSK1 and D195A/D565A (0.5  $\mu$ g each) were phosphorylated by 2.5 ng (*lanes 2 and 5*) or 25 ng (*lanes 3 and 6*) of pp38 in 35  $\mu$ M [ $\gamma$ - $^{32}$ P]ATP. The phosphorylated proteins were detected by autoradiography. The position of MSK1 is indicated on the right. In all the subsequent experiments using MSK1 or its derivative mutants,  $\sim$ 4.2 ng of pp38 was added per 100 ng of MSK1 to fully activate MSK1 purified from insect cells.

## Supplemental FIGURE S2

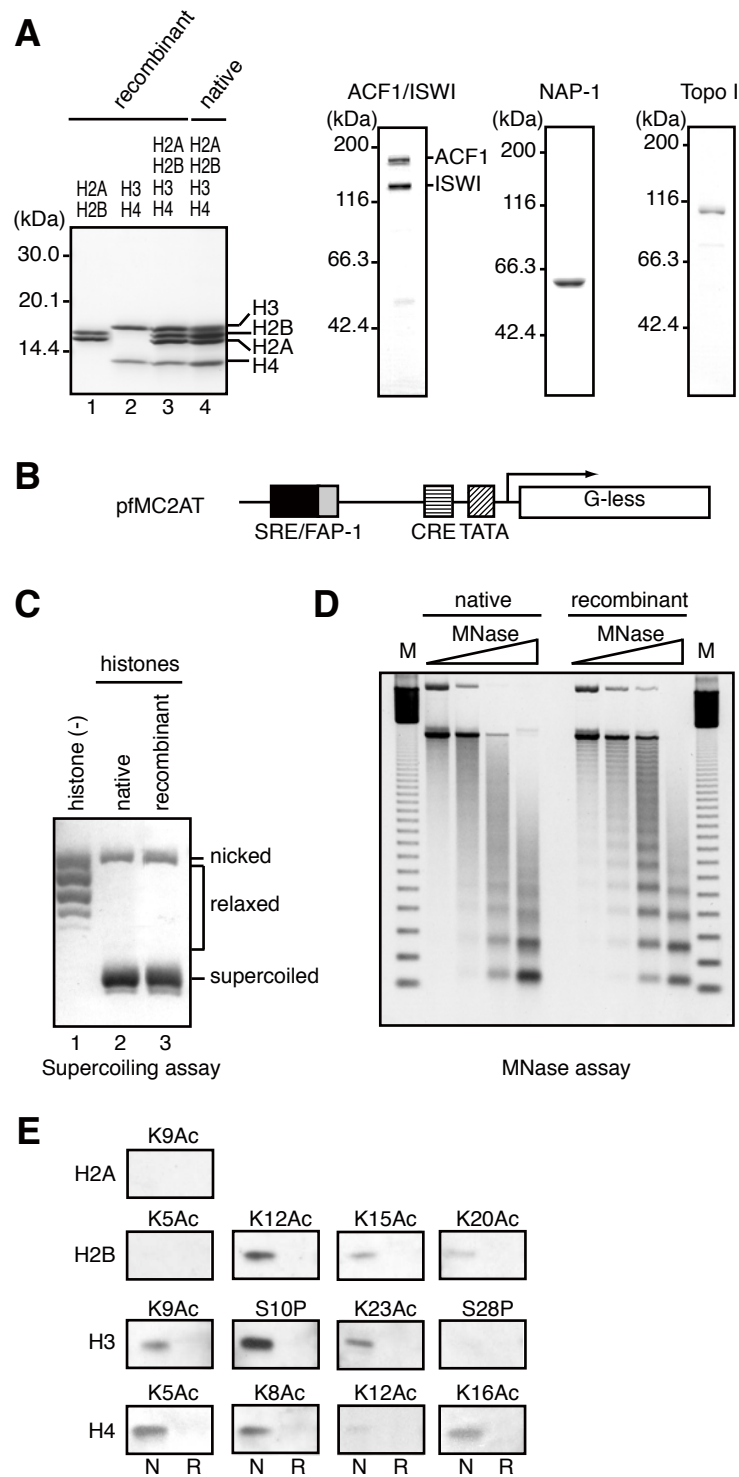

**FIGURE S2. Nucleosomes assembled on the *c-fos* promoter with recombinant histones.** *A*, purified histones and chromatin assembly factors. Recombinant histones H2A and H2B (*lane 1*), histones H3 and H4 (*lane 2*), mixture of histones H2A, H2B, H3 and H4 (*lane 3*) as well as HeLa cell-derived core histones (*lane 4*) were analyzed by SDS-PAGE. The purified chromatin assembly factors including *Drosophila* ACF1/ISWI, human NAP-1, and human Topo I were analyzed by SDS-PAGE. *B*, the 3,420-bp plasmid (pfMC2AT) includes the *c-fos* promoter (-11~-402) and a G-less cassette. The positions of the SRE, FAP-1, CRE and the TATA box are indicated. *C*, the relaxed plasmid (*lane 1*) was assembled into chromatin with recombinant (*lane 2*) or HeLa cell-derived core histones (*lane 3*), and the degree of superhelicity was analyzed by electrophoresis on an agarose gel. The positions of nicked, relaxed and supercoiled plasmids are indicated. *D*, micrococcal nuclease (MNase) digestion assays. The assembled chromatin was partially digested at two different concentrations of MNase, and the digested plasmid DNA was analyzed by electrophoresis on an agarose gel. The marker lane (M) is a 123-bp DNA ladder. *E*, analyses of posttranslational modifications of recombinant or HeLa cell-derived histones. Histone modifications were analysed by immunoblot using antibodies that recognize specifically modified residues within histones. HeLa cell-derived native histones (N) or recombinant histones (R) were tested for acetylation (Ac) and phosphorylation (P) of the indicated residues. K9Ac, for example, indicates the acetylated lysine 9.

### Supplemental FIGURE S3

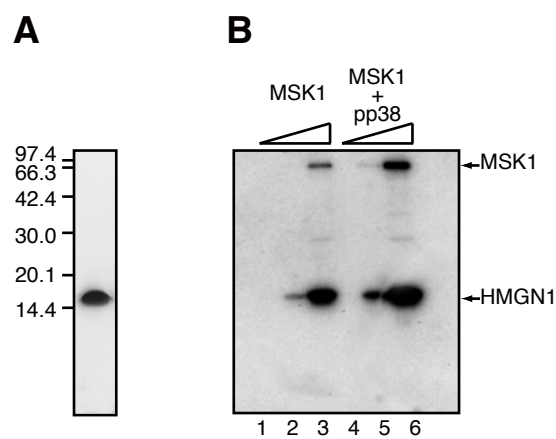

**FIGURE S3. Phosphorylation of HMGN1 by MSK1.** *A*, purified recombinant HMGN1 (500 ng) was analyzed by SDS-PAGE. *B*, HMGN1 (500 ng) was phosphorylated by MSK1 alone (*lanes 1-3*) or MSK1 and pp38 (*lanes 4-6*). The reactions contained 5 ng (*lanes 1 and 4*), 50 ng (*lanes 2 and 5*) and 500 ng (*lanes 3 and 6*) of MSK1, together with 0.25 ng (*lane 4*), 2.5 ng (*lane 5*) and 25 ng (*lane 6*) of pp38. The phosphorylation was detected by autoradiography, and the positions of HMGN1 and phosphorylated MSK1 are indicated on the right.

## Supplemental FIGURE S4

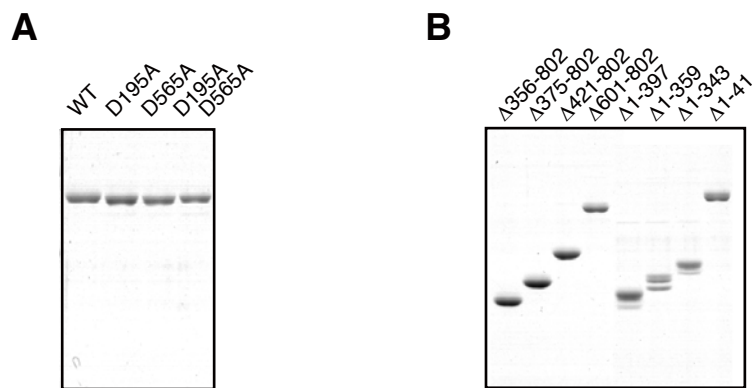

**FIGURE S4. Purified MSK1 and its mutants.** *A*, D195A, D565A and D195A/D565A have an alanine in place of an aspartate at residue(s) 195, 565 or both 195 and 565, respectively. Purified recombinant MSK1 mutants were analyzed by SDS-PAGE. *B*, a series of N-terminal and C-terminal deletion mutants were purified and analyzed by SDS-PAGE.
